# Supplementary material
Source: PubMed Central journal article supplement (PMC2879619)
Supplement: NIHMS202724-supplement-02.pdf [file NIHMS202724-supplement-02.pdf]

| Region                 | Forward                           | Probe                             | Reverse                       | Loc <sup>1</sup> |
|------------------------|-----------------------------------|-----------------------------------|-------------------------------|------------------|
| <b>Igk locus</b>       |                                   |                                   |                               |                  |
| V <sub>κ</sub> h24     | 5'-TGGTTTGTTCCTTGTCTGGA-3'        | 5'-TCAACATGGCAAATTGAAGCCATTCT-3'  | 5'-TCCCATTTCCTAGGGATTCA-3'    | 25H              |
| V <sub>κ</sub> X24     | 5'-AGTGGCCAGTGATTTGATTG-3'        | 5'-CAGTATTCCACACAGGGTGCTCTGC-3'   | 5'-CAAGGATGCAGAGGACATTG-3'    | 41H              |
| V <sub>κ</sub> 12-38   | 5'-AGTGGGAGCACAGGTTGC-3'          | 5'-CCAGCTGCTCCTTACGATGTCTCCA-3'   | 5'-TCACTCTCAACAGCTCAGCA-3'    | 17H              |
| V <sub>κ</sub> 21-3    | 5'-GCTCCAGGGCTGAACAAA-3'          | 5'-CCTCAGTGAGCTGCAACTCCAGGA-3'    | 5'-AGCTCTGTGTTGAGATGTCAGAG-3' | X                |
| V <sub>κ</sub> 220     | 5'-TATGCAACATCCAACTGGCTCT-3'      | 5'-TCCCWGCTCGCTTCAGTGGCAGT-3'     | 5'-CCATGCTGCTGATTGTGAGAGAG-3' | 53H              |
| V <sub>κ</sub> (degen) | 5'-TCCATGCTGCTGATTATGAGAGART-3'   | 5'-TCCCWGCTCGCTTCAGTGGCAGT-3'     | 5'-GCAATCCAACCTGGCTTCt-3'     | ≈50H             |
| J <sub>κ</sub> 1       | 5'-TTGTACAGCCAGACAGTGGAG-3'       | 5'-TGGTGCCTCCACCGAACGTC-3'        | 5'-GCCACAGACATAGACAACGG-3'    | X                |
| J <sub>κ</sub> 2       | 5'-CAGATTCTGGCACTCTCCAA-3'        | 5'-CAAAGAAGCAGGGTAGCCTGCC-3'      | 5'-ACTGAGCATGGTCTGAGCAC-3'    | X                |
| J <sub>κ</sub> 4       | 5'-AGTGTGAAAGCTGAGCGAAA-3'        | 5'-CCTGCCTGTGAAGCCAGTCCA-3'       | 5'-CACAGTGAGGACTATGACATGC-3'  | 12H              |
| J <sub>κ</sub> 5       | 5'-CATAGTCCTCACTGTGGCTCA-3'       | 5'-CTTGGTCCCAGCACCGAACG-3'        | 5'-AGTGTACTTACGTTTCAGCTCCA-3' | X                |
| C <sub>κ</sub>         | 5'-GTGGAAGATTGATGGCAGTG-3'        | 5'-CAGTCCAAGTTCAGGACGCCA-3'       | 5'-GCTCATGCTGTAGGTGCTGT-3'    |                  |
| <b>Igh locus</b>       |                                   |                                   |                               |                  |
| Vh558-77               | 5'-AAATCCTCCAGCACAGCCTA-3'        | 5'-CATGCAGCTCAGCAGCCTGACA-3'      | 5'-TAGACCGCAGAGTCCTCAGA-3'    | 12H              |
| Vh558-72               | 5'-ATCTGAGGACTCTGCGGTCT-3'        | 5'-CTGTGCAAGACACAGTGTTGCAACC-3'   | 5'-CCTCCAGGGTTTCTGACT-3'      | X                |
| Vh558-47               | 5'-GGAGCTCAGCCGATTAACAT-3'        | 5'-TTGCAACACTGTGCCTTGACACA-3'     | 5'-TTGACACACACAGGATGTGG-3'    | X                |
| Vh558-31               | 5'-CATGGAATATCCTCGATTGG-3'        | 5'-TCAATGTGGCCTTGCCCTTGA-3'       | 5'-GCTCCATGTAGGCTGTGCTA       | 46H              |
| Vh558-18               | 5'-AAGGCCACATTGACTGTTGA-3'        | 5'-TCCTCCAGCACAGCCTACATGGA-3'     | 5'-CCTCAGATGTCAGGCTGTTG-3'    | 25H              |
| VhSM7                  | 5'-TCTGAGGACACTGCCGTCTA-3'        | 5'-ACTGTGCTAGACACAGTGTTGCAACCA-3' | 5'-TTTCTGACACGCTCAGGATG-3'    | X                |
| VhS107                 | 5'-CAGAGACACTTCCCAAAGCA-3'        | 5'-CCCTGAGAGCTGAGGACACTGCC-3'     | 5'-GTGTCTGGGCTCACAATGAC-3'    | X                |
| Vh81x                  | 5'-GACCCTGTACCTGCAAATGA-3'        | 5'-CAAGGCTGTGTCTCAGACCTCAGA-3'    | 5'-TTGCTCATTGTGTGCTTGC-3'     | X                |
| DFL16.1                | 5'-CCTGCAAACAGAGCTTACCA-3'        | 5'-TGTGTGCCAATCACATTCCCA-3'       | 5'-TCCAGTACTGCTGCTTGGTC-3'    | X                |
| DSP2                   | 5'-CTCTGCACTGCTACCTCTGG-3'        | 5'-CCAGACAATGTTCTGCAGAACCTG-3'    | 5'-AAATCCCTGCCAAGTAAGGTA-3'   | X                |
| DQ52                   | 5'-CATTGGTCCCTGACTCAAGA-3'        | 5'-CCCTGTGGTCTCTGACTGGTGCA-3'     | 5'-TCCCAGTTAGCACTGTGGTG-3'    | 200N-5'          |
| Jh1                    | 5'-TGCTACTGGTACTTCGATGTCTG-3'     | 5'-CGCAGGGACCACGGTCACC-3'         | 5'-GCCAGCTTACCTGAGGAGAC-3'    | X                |
| Jh2                    | 5'-CAGTCTCCTCAGGTGAGTCCT-3'       | 5'-CCCAAGGTGTCCCTAGTCCTTCATGA-3'  | 5'-CCCAATGACCCTTTCTGACT-3'    | X                |
| Jh3                    | 5'-TGTGCCTGGTTTGCTTACTG-3'        | 5'-AGTGACCAGAGTCCCTTGGCCC-3'      | 5'-GCAGAGAATCTTGGTCCTG-3'     | X                |
| Jh4                    | 5'-TGTGATTACTATGCTATGGACTACTGG-3' | 5'-TCAAGGAACCTCAGTCACCGTCTCC-3'   | 5'-GGAGAGGCCATTCTTACCTG-3'    | X                |
| C <sub>μ</sub>         | 5'-CCATTTCTTCACCTGGAAC-3'         | 5'-CCAGAACAACACTGAAGTCATCCAGGG-3' | 5'-TCAGTGTTGGGAAGGTTCTG-3'    |                  |
| <b>Tcra locus</b>      |                                   |                                   |                               |                  |
| TRAV1                  | 5'-TCTGCCTCATACCTCTGTGC-3'        | 5'-TGCTAACCTCTGCAGCTGCACAGA-3'    | 5'-ACTCCTGCTGTGTCCCTCTT-3'    | X                |
| TRAV16                 | 5'-TCCATCGGACTCATCAC-3'           | 5'-CGCCACACAGATTGAGGACTCAGC-3'    | 5'-GTGCCCTCTCTCATAGCACA-3'    | X                |
| TRAV17                 | 5'-CGTCACGCTCTATGAAGGAG-3'        | 5'-TGGCCAGGATACTGCACGTACCA-3'     | 5'-TTGAGGAGAACTGGAGGCT-3'     | 137H             |

|                                   |                                |                                    |                                |         |
|-----------------------------------|--------------------------------|------------------------------------|--------------------------------|---------|
| TRAV19                            | 5'-TCCTGATATCCGTACGCTCA-3'     | 5'-TCACTGCACATCACAGCCTCCC-3'       | 5'-CACTGCTGTGTCTTCAGGCT-3'     | 18H     |
| TRAV21                            | 5'-CCTTAGGTATTGCGGGTGAT-3'     | 5'-TGCCTTGTAGCCACGCCACA-3'         | 5'-CTGAAGAGGAACCTGTCCGGT-3'    | 150H    |
| TEA                               | 5'-GAGCTCACTATTCACCAGTCA-3'    | 5'-TCTCTTATCCTTGAAGCCCGTCTCTT-3'   | 5'-ATCCACTTCTCTGGGTCTCTTAG-3'  |         |
| TRAJ61                            | 5'-GGTGTCTACTTCTGTGGGTA-3'     | 5'-TGAGTCTTCCAGTCATGGCTCCAAA-3'    | 5'-TCAGATGTTACTTGCTGAGTTTCA-3' | X       |
| TRAJ58                            | 5'-GTTTCAGTTGATGCCACGAGT-3'    | 5'-CCCTTCAGTGCAGTGTGCAGCA-3'       | 5'-ACAGCTTAGACCCAGTGCCT-3'     | X       |
| TRAJ56                            | 5'-GGGAGGTTTGGACAACACTGAG-3'   | 5'-TCCAGTAGCCACACAATGACACGG-3'     | 5'-CTCAGAACGGTTCCTTGACC-3'     | X       |
| TRAJ55                            | 5'-TGGGAAGAGTCCTCTGGAGT-3'     | 5'-CCAAACCCGTAGCCAGGCCA-3'         | 5'-TCAACATCCCTCATCTCCCT-3'     | X       |
| TRAJ53                            | 5'-CAGGCTGTGGGAACAGTG-3'       | 5'-CCCAAATGTCAGTTTGTAAATTGCTGCC-3' | 5'-TGGAGTCACAGTTAAGAGAGTTCC-3' | X       |
| TRAJ52                            | 5'-TAAAGGCCCGTGTTACAGTG-3'     | 5'-CCGTGTCCAAACGTGAGCTTTCC-3'      | 5'-GATGGACCCTAAGGATGGTG-3'     | X       |
| TRAJ49                            | 5'-AGCTCTGTCTTCTGCTGGTTT-3'    | 5'-TCTGGTAACCCGTGTTCCACTGTGA-3'    | 5'-TCAAACCTGTTCTTTCCCA-3'      | X       |
| TRAJ48                            | 5'-ACACTGTGGCCAACACTATGGA-3'   | 5'-CCCTAGTCAGGAGACCAGCCGC-3'       | 5'-AAATCCCTAAGCCTGCGT-3'       | X       |
| TRAJ45                            | 5'-TATGAGCTGTGCTGCCATTT-3'     | 5'-TCACACCCTGAGGCAAGCCTTG-3'       | 5'-AGCTGAGTTCCTTTCCAAA-3'      | X       |
| TRAJ37                            | 5'-TTGTAAAGTGCAGCATTGGG-3'     | 5'-CCTTCAGACCCACCTGGTTGCA-3'       | 5'-AATGAGCATAAAGCGACAGC-3'     | X       |
| TRAJ16                            | 5'-GGATTCCAAATTTGATTCATTG-3'   | 5'-CCATTCATCCAGACATCACGGGA-3'      | 5'-ATGAGAGGGCACCTTGCT-3'       | 80H     |
| TRAC                              | 5'-CCCAGATTTGTGAGGAAGGT-3'     | 5'-TAAGCACTGCTGCCGCACCC-3'         | 5'-CTTCAGATCCAGGAGAAGCC-3'     |         |
| <b><i>Tcrβ</i> locus</b>          |                                |                                    |                                |         |
| TRBV1                             | 5'-CCAGGGCAGAACCTTGTACT-3'     | 5'-TCTGCAGGCGCATTGAAACAAA-3'       | 5'-GCAGGGTAGTCTGTGTGTGG-3'     | X       |
| TRBV16                            | 5'-GCGGTGTATCTTTGTGCAAG-3'     | 5'-TCTGCTGAGGCAGAAACCATACGC-3'     | 5'-GGAGGTGGACAGGAGAGG-3'       | X       |
| TRBD1                             | 5'-GCCACGGTGATTCAATTCTA-3'     | 5'-TGTCCCAAGGCCACAGTCCT-3'         | 5'-GCGACCCAGGAGAAGAGTAG        | X       |
| TRBJ1-1                           | 5'-CTAGATACTAGCTGGGAAGAGCCT-3' | 5'-TCCTCATCCTATGGCACTGTGCAA-3'     | 5'-TGAGTCTGGTTCCTTTACCAA-3'    | X       |
| TRBJ1-6                           | 5'-CAGCTGTGTTCCCTATAATTCGC-3'  | 5'-AGGCACCCGGCTCACTGTGA-3'         | 5'-ACCATGGTCATCCAACACAG-3'     | X       |
| TRBC1                             | 5'-CCCAAGAAGCTAAACAAGGC-3'     | 5'-CCAGATCCTCATTCCGGAACCC-3'       | 5'-TACAAGGAGCATGGAATGGA-3'     |         |
| TRBD2                             | 5'-GTGAAAGGCTATCCAGGGAA-3'     | 5'-TGGGACCACCATTGAGCCCTT-3'        | 5'-ACGGATACTTTGCTGATGGTT-3'    | 129N-3' |
| TRBJ2-1                           | 5'-TATGCTGAGCAGTTCCTTCGG-3'    | 5'-CAGGGACACGACTCACCGTCCT-3'       | 5'-CCTACCTTCTCTCCACCTG-3'      | 69H     |
| TRBJ2-5                           | 5'-TGTGAACCAAGACACCCAGT-3'     | 5'-CCGAGTGCCTGGCCCAAAGT-3'         | 5'-CAGCTCACCTAACACGAGGA-3'     | X       |
| TRBJ2-7                           | 5'-TGAGCCTCTGTGCTCCTATG-3'     | 5'-CGGCACCAGGCTCACGGTTT-3'         | 5'-GTGGAAGCGAGAGATGTGAA-3'     | X       |
| TRBC2                             | 5'-GTGGCTTTCTTTACCCAAAT-3'     | 5'-TCCCTCTCCTTTCTTTGAGACTGTGGA-3'  | 5'-TTTCAAAGCCAAGACCACAG-3'     |         |
| TRBV31                            | 5'-GTGTGAGACTCCAGGCACAG-3'     | 5'-TTCCAGGCCGAAGGACGACC-3'         | 5'-GTGCAACTGAACCTCTCAGC-3'     | X       |
| <b>Non antigen receptor genes</b> |                                |                                    |                                |         |
| $\alpha$ -actin                   | 5'-GGCACGTGACACTCTTGTCT-3'     | 5'-ATCGGTGGCTCCATCCTGGC-3'         | 5'-GTCGTA CTCTGCTTGGTGA-3'     |         |
| $\beta$ -actin                    | 5'-AGTGTGACGTTGACATCCGT-3'     | 5'-TGCATCCTGTCAGCAATGCCTG-3'       | 5'-TGCTAGGAGCCAGAGCAGTA-3'     |         |
| $\beta$ -globin                   | 5'-GCTGCTGGTTGTCTACCCTT-3'     | 5'-TCCAAAGCTATCAAAGTACCGCTGGG-3'   | 5'-GCAGAGGCAGAGGATAGGTC-3'     |         |
| $\gamma$ -actin                   | 5'-CCTCCTCCAATAAAGGGACA-3'     | 5'-AGAAGTGGTACCCTCTCCACG-3'        | 5'-GCCATCACATCCAGTCA-3'        |         |
| Elp4                              | 5'-AGAGTTCCGATTGGGTCATC-3'     | 5'-AGCTCCCGGTCTGTGGCGTC-3'         | 5'-TGCCCTTCTCTGGAAACTA-3'      |         |

|                                                                    |                            |                               |                            |      |
|--------------------------------------------------------------------|----------------------------|-------------------------------|----------------------------|------|
| Rars2                                                              | 5'-CCTTAGACACGGAGGAGGTG-3' | 5'-CATGCCTCCCTTTCCCGCAC-3'    | 5'-GACCTACGAAAGCCACACG-3'  |      |
| 6430706D22Rik                                                      | 5'-GTTTCCACCGGAAGTGCT-3'   | 5'-AACCGATCCTGCCCGCGTT-3'     | 5'-GCGCGCTAATAGGGTCTTT-3'  |      |
| D030013I16Rik                                                      | 5'-GGACCACAGATTGGAAGCA-3'  | 5'-TCCTGTCCACGACCAGTGACTGC-3' | 5'-GAGATGGCCGGAGAGAGTC-3'  |      |
| Mrps5                                                              | 5'-GCTGACGACGAACTTGTGAC-3' | 5'-TCCTCACCGCCTGCAGCAAC-3'    | 5'-AGCTACACAATGCAGGGAGA-3' |      |
| Fahd1                                                              | 5'-AGAGACCTTTCGCTGACCTC-3' | 5'-TCTGGAGGCCGCCGTAGTCC-3'    | 5'-GGTCATGTGACCACCGACT-3'  |      |
| <b>Retroviral recombination substrates (pINV-12/23 and pINV-0)</b> |                            |                               |                            |      |
| 12a                                                                | 5'-CCTCTAGACTGCCGGATCTC-3' | 5'-TCCCTCCTCCAAGCCCTGGA-3'    | 5'-CATAAGCCTGCTGGTTCAGA-3' | X    |
| 12b                                                                | 5'-ACGCGTCACAGAGAAATGAA-3' | 5'-TCCCTCCTCCAAGCCCTGGA-3'    | 5'-CATAAGCCTGCTGGTTCAGA-3' | 69H  |
| 23c                                                                | 5'-AGGCTGAACTCATGCTGGAT-3' | 5'-CCAGCCTGACAGCCTGCCTG-3'    | 5'-TCTCAGTCTTGCAGGTGTCC-3' | 109N |
| 23d                                                                | 5'-GCAAGACTGAGAGCAGGAGA-3' | 5'-CCGTCCTCGAGGCACCATGA-3'    | 5'-ACACCGGCCTTATTCAA-3'    | X    |

Table S1. List of oligonucleotide primers and probes used for sequence detection. Oligonucleotides are listed 5' to 3'. Primers were obtained from Invitrogen. Hydrolysis probes were labeled at the 5' end with the reporter dye 6-carboxyfluorescein (FAM) and at the 3' end with the quencher dye Black Hole Quencher (BHQ) (Biosearch Technologies).

<sup>1</sup>Location of PCR product relative to the RSS for gene segments containing RSSs. X indicates that the PCR product spans the RSS, whereas numbers indicate the distance in bp from the either the heptamer end (H) or nonamer end (N) of the RSS. For example, "69H" indicates that the PCR product is 69 bp from the first residue of the heptamer, while "109N" indicates a distance of 109 bp from the terminal residue of the nonamer. For D elements, 3' or 5' is included to indicate the RSS 3' or 5' or the D segment.

| <b>Genotype of thymocytes</b> | <b>Antibody used for IP</b> | <b>Total sequencing reads passing quality filter</b> | <b>Uniquely aligned sequencing reads</b> | <b>Percentage aligned reads</b> |
|-------------------------------|-----------------------------|------------------------------------------------------|------------------------------------------|---------------------------------|
| Wild type                     | RAG2                        | 15,836,506                                           | 7,566,851                                | 48%                             |
| RAG2 <sup>-/-</sup>           | RAG2                        | 15,066,878                                           | 7,140,058                                | 47%                             |
| D708A-R1 <sup>-/-</sup> β     | RAG2                        | 15,369,687                                           | 8,417,638                                | 55%                             |
| D708A-R1 <sup>-/-</sup> β     | H3K4me3                     | 14,838,753                                           | 12,130,218                               | 82%                             |
| Wild type                     | H3K4me3                     | 11,921,334                                           | 7,612,684                                | 64%                             |

Table S2. Sequencing data for ChIP-sequencing analysis of total thymocytes.
